# Correction

# Correction: The Use of Weighted Graphs for Large-Scale Genome Analysis

The PLOS ONE Staff

Figure 2 is erroneously cropped. Please view a complete version [here](#).

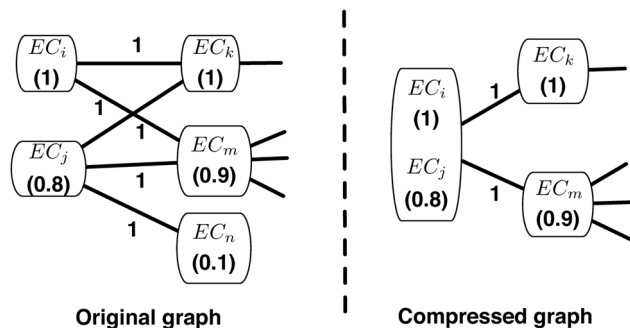

**Figure 2. A example of weighted graph compression based on node weights.** Node weights are in the parenthesis.  
doi:10.1371/journal.pone.0089618.g002

## Reference

1. Zhou F, Toivonen H, King RD (2014) The Use of Weighted Graphs for Large-Scale Genome Analysis. PLoS ONE 9(3): e89618. doi:10.1371/journal.pone.0089618

**Citation:** The PLOS ONE Staff (2014) Correction: The Use of Weighted Graphs for Large-Scale Genome Analysis. PLoS ONE 9(12): e116432. doi:10.1371/journal.pone.0116432

**Published:** December 19, 2014

**Copyright:** © 2014 The PLOS ONE Staff. This is an open-access article distributed under the terms of the Creative Commons Attribution License, which permits unrestricted use, distribution, and reproduction in any medium, provided the original author and source are credited.
